# Supplementary material for: Magnetic few-layer graphene nanocomposites for the highly efficient removal of benzo(a)pyrene from water
Source: Royal Society of Chemistry journal article supplement (doi:10.1039/d3en00047h), 2023-01-01
Supplement: d3en00047h1.pdf [file d3en00047h1.pdf]

## Supporting Information

### **Magnetic few-layers graphene nanocomposites for the highly efficient removal of benzo(a)pyrene from water**

*Joana Vaz-Ramos, Dominique Bégin, Paula Duenas-Ramirez Anaïs Becker, Mathieu Galmiche, Maurice Millet, Sylvie Bégin\*, Stéphane Le Calvé\**

**Table S1.** Previous studies reported in the literature using carbon based and/or magnetic materials for the adsorption of PAHs in water <sup>19,26–32</sup>

| Adsorbent <sup>a)</sup>                             | Adsorbent Conc. (mg L <sup>-1</sup> ) | PAH <sup>b)</sup> | PAH Conc. (µg L <sup>-1</sup> ) | Co-solvent <sup>c)</sup> | Method <sup>d)</sup>    | RE <sup>e)</sup> (%)                        | q <sub>max</sub> <sup>f)</sup> (mg g <sup>-1</sup> ) | Recovery <sup>g)</sup> (%) | Ref.                         |                  |     |        |      |   |
|-----------------------------------------------------|---------------------------------------|-------------------|---------------------------------|--------------------------|-------------------------|---------------------------------------------|------------------------------------------------------|----------------------------|------------------------------|------------------|-----|--------|------|---|
| Fe <sup>0</sup> /iron oxide-oxyhydroxide/graphene   | 300                                   | Mix 16 EPA PAHs   | 1                               | n.m.                     | MSPE                    | -                                           | -                                                    | ~95                        | <i>Karamani et al.</i>       |                  |     |        |      |   |
| Fe <sup>0</sup> /iron oxide-oxyhydroxide            |                                       |                   |                                 |                          |                         | -                                           | -                                                    | ~10                        |                              |                  |     |        |      |   |
| graphene                                            |                                       |                   |                                 |                          |                         | -                                           | -                                                    | 80                         |                              |                  |     |        |      |   |
| GO/ FeO•Fe <sub>2</sub> O <sub>3</sub>              | 100                                   | NAP               | 20x10 <sup>3</sup>              | n.m.                     | BA                      | -                                           | 337 (283K)<br>636 (303K)<br>733 (323K)               | -                          | <i>Yang et al.</i>           |                  |     |        |      |   |
| MWCNTs/ FeO•Fe <sub>2</sub> O <sub>3</sub>          |                                       |                   |                                 |                          |                         | -                                           | 135 (283K)<br>445 (303K)<br>456 (323K)               | -                          |                              |                  |     |        |      |   |
| FeO•Fe <sub>2</sub> O <sub>3</sub>                  |                                       |                   |                                 |                          |                         | -                                           | 73 (283K)                                            | -                          |                              |                  |     |        |      |   |
| m-G/CNF                                             | 1000                                  | NAP               | 0.1<br>50                       | MeOH (residual)          | Magn. SPE <sup>h)</sup> | -                                           | -                                                    | 99.3<br>99.8               | <i>Rezvani-Eivari et al.</i> |                  |     |        |      |   |
|                                                     |                                       | FL                | 0.1<br>50                       |                          |                         | -                                           | -                                                    | 97.9<br>98.8               |                              |                  |     |        |      |   |
|                                                     |                                       | PHE               | 0.1<br>50                       |                          |                         | -                                           | -                                                    | 99.1<br>99.9               |                              |                  |     |        |      |   |
| Iron oxide nanoparticles                            | 10                                    | BaP               | 1                               | n.m.                     | BA                      | 20 <sup>i)</sup><br>71.6 <sup>i)</sup>      | -                                                    | -                          | <i>Hassan et al.</i>         |                  |     |        |      |   |
|                                                     | 130                                   |                   | 1–4                             | n.m.                     |                         | BA                                          | 99–79.5 <sup>j)</sup>                                | 0.029                      |                              | -                |     |        |      |   |
|                                                     | 90                                    | PY                | 100                             | n.m.                     | BA                      | 30 <sup>i)</sup><br>67.8 <sup>i)</sup>      | -                                                    | -                          |                              |                  |     |        |      |   |
|                                                     | 10                                    |                   | 100–400                         | n.m.                     |                         | BA                                          | 98–78.3 <sup>j)</sup>                                | 2.8                        |                              | -                |     |        |      |   |
| C <sub>11</sub> -Fe <sub>3</sub> O <sub>4</sub>     | 30                                    | BaP               | 2                               | n.m.                     | BA                      | 8.4<br>79.7                                 | -                                                    | -                          | <i>Yang et al.</i>           |                  |     |        |      |   |
|                                                     | 180                                   |                   | 0.5–14                          | n.m.                     |                         | -                                           | 59.89x10 <sup>-3</sup>                               | -                          |                              |                  |     |        |      |   |
|                                                     | 180                                   |                   | 2                               | n.m.                     |                         | 14.7<br>93.9                                | -                                                    | -                          |                              |                  |     |        |      |   |
| CDs/C <sub>11</sub> -Fe <sub>3</sub> O <sub>4</sub> | 30                                    | BaP               | 2                               | n.m.                     | BA                      | -                                           | 76.23x10 <sup>-3</sup>                               | -                          | <i>Yang et al.</i>           |                  |     |        |      |   |
| 180                                                 | 0.5–14                                |                   | n.m.                            | -                        |                         | -                                           | -                                                    |                            |                              |                  |     |        |      |   |
| 180                                                 | 2                                     |                   | n.m.                            | -                        |                         | -                                           | -                                                    | -                          |                              |                  |     |        |      |   |
| MMWCNT                                              | 5                                     | PHE               | 50–800                          | DMSO (<0.1%)             | BA                      | ~10-20<br>~100                              | -                                                    | -                          | <i>Zhang et al.</i>          |                  |     |        |      |   |
|                                                     | 100                                   |                   | 50–800                          |                          |                         | -                                           | 20.0 – 28.46                                         | -                          |                              |                  |     |        |      |   |
|                                                     | 20                                    |                   | 50–800                          |                          |                         | -                                           | -                                                    | -                          |                              |                  |     |        |      |   |
| MSWCNT                                              | 5                                     | PHE               | 50–800                          | DMSO (<0.1%)             | BA                      | ~80<br>~100                                 | -                                                    | -                          | <i>Zhang et al.</i>          |                  |     |        |      |   |
|                                                     | 100                                   |                   | 50–800                          |                          |                         | -                                           | 74.61                                                | -                          |                              |                  |     |        |      |   |
|                                                     | 20                                    |                   | 50–800                          |                          |                         | -                                           | -                                                    | -                          |                              |                  |     |        |      |   |
| MGNS                                                | 5                                     | PHE               | 50–800                          | DMSO (<0.1%)             | BA                      | ~25<br>~100                                 | -                                                    | -                          | <i>Zhang et al.</i>          |                  |     |        |      |   |
|                                                     | 100                                   |                   | 50–800                          |                          |                         | -                                           | 31.53                                                | -                          |                              |                  |     |        |      |   |
|                                                     | 20                                    |                   | 50–800                          |                          |                         | -                                           | -                                                    | -                          |                              |                  |     |        |      |   |
| MGO                                                 | 20                                    | PHE               | 10–1200                         | ACN (<0.1%)              | BA                      | -                                           | 13.65                                                | -                          | <i>Huang et al.</i>          |                  |     |        |      |   |
| MCRG                                                | 4.2                                   |                   |                                 |                          |                         | -                                           | 30.12                                                | -                          |                              |                  |     |        |      |   |
| MARG                                                | 12.5                                  |                   |                                 |                          |                         | -                                           | 26.18                                                | -                          |                              |                  |     |        |      |   |
| Graphene wool                                       | 1000                                  | 16 EPA PAHs       | 400–500                         | MeOH (1 %)               | BA                      | 52.2–72.6<br>55.1–80<br>65.3–85.1<br>80–100 | -                                                    | -                          | <i>Adeola &amp; Forbes</i>   |                  |     |        |      |   |
|                                                     | 1250                                  |                   |                                 |                          |                         | NAP                                         | 100–500                                              | MeOH (1 %)                 |                              | BA <sup>k)</sup> | -   | 0.0489 | -    |   |
|                                                     | 1500                                  |                   |                                 |                          |                         |                                             |                                                      |                            |                              |                  | ANT | -      | 12.2 | - |
|                                                     | 2500                                  |                   |                                 |                          |                         |                                             |                                                      |                            |                              |                  | BaA | -      | 2.35 | - |
|                                                     | 2500                                  | BaP               | -                               | 1.52                     | -                       |                                             |                                                      |                            |                              |                  |     |        |      |   |
|                                                     | 1000                                  | BghiP             | -                               | 16.0                     | -                       |                                             |                                                      |                            |                              |                  |     |        |      |   |

|            |   |     |         |             |       |       |       |   |           |
|------------|---|-----|---------|-------------|-------|-------|-------|---|-----------|
| FLG@TA@RSN | 5 | BaP | 10      | EtOH (1 %)  | BA    | 99.95 | 1.27  | - | This work |
|            |   |     |         | EtOH (10 %) |       | 95.42 | -     | - |           |
|            |   |     |         | EtOH (50 %) |       | 31.70 | -     | - |           |
|            |   |     | 10–5000 | EtOH (50 %) |       | -     | 68.13 | - |           |
| FLG@TA     |   |     | 10      | EtOH (50 %) | 25.76 | -     | -     |   |           |

<sup>a)</sup> Fe<sup>0</sup> – zero-valent iron, GO – graphene oxide, MWCNTs – multi-walled carbon nanotubes, m-G/CNF – magnetized graphene on carbon nanofibers, rGO – reduced graphene oxide, CDs/C<sub>11</sub>-Fe<sub>3</sub>O<sub>4</sub> – carbon dots/fatty acid-coated magnetic nanoparticles, MMWCNTs – magnetic multi-walled carbon nanotubes, MSWCNTs – magnetic single-walled carbon nanotubes, MGNS – magnetic graphene nanosheets, MGO – magnetic graphene oxide, MCRG – magnetic chemically-reduced graphene, MARG – magnetic annealing-reduced graphene; <sup>b)</sup> NAP – naphthalene, FL – fluorene, PHE – phenanthrene, ANT – anthracene, PY – pyrene, BaP – benzo(a)pyrene; <sup>c)</sup> n.m. – not mentioned, MeOH – methanol, DMSO – Dimethyl sulfoxide, ACN – acetonitrile, EtOH – ethanol; <sup>d)</sup> MSPE – micro solid-phase extraction, BA – batch adsorption, magn. SPE – magnetic solid phase extraction; <sup>e)</sup> RE – removal efficiency obtained for batch experiments; <sup>f)</sup> q<sub>max</sub> – maximum adsorption capacity; <sup>g)</sup> recovery = (amount of PAH present in the solution after desorption of the adsorbent / amount of PAH present in the initial solution)×100 and is typically calculated in solid-phase extraction experiments; <sup>h)</sup> tap water samples spiked with the indicated PAHs; <sup>i)</sup> for adsorption time of 30 minutes; <sup>j)</sup> for adsorption time of 150 minutes; <sup>k)</sup> single solute experiments.

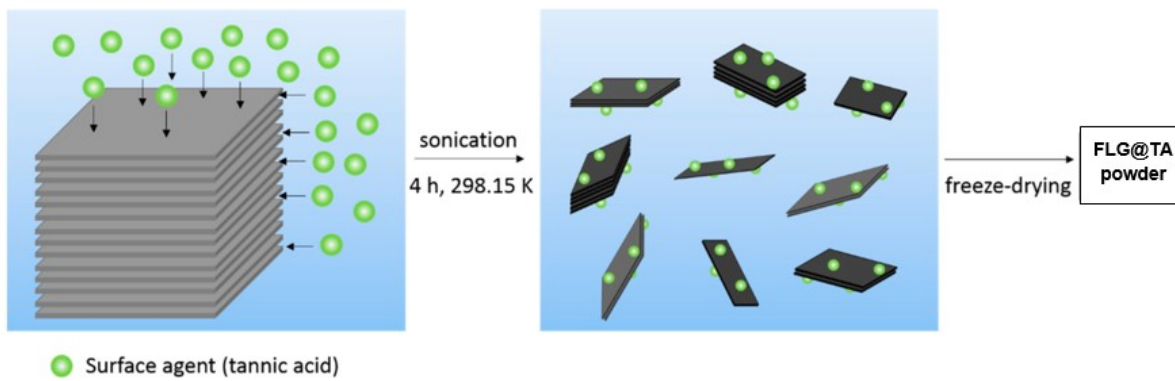

**Figure S1.** Illustration of the preparation of FLG@TA.

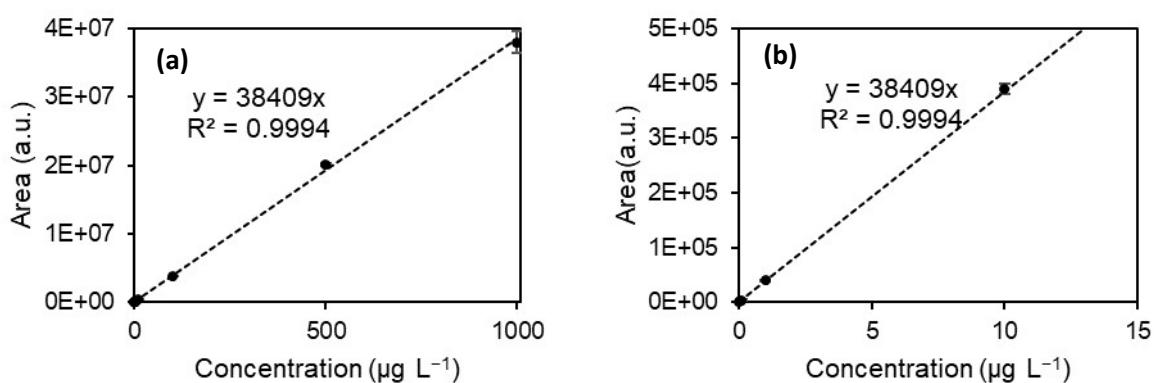

**Figure S2.** (a) 7-point calibration curve of benzo(a)pyrene (BaP) obtained by Ultra High-Performance Liquid Chromatography with Fluorescence Detection (UHPLC/FLD) in the range 0.010–1000 µg L<sup>-1</sup> of BaP concentration in acetonitrile; (b) Zoom in on the calibration curve of BaP obtained by UHPLC/FLD in the range 0.010–10 µg L<sup>-1</sup> in acetonitrile. The vertical error bars correspond to the standard deviation of peak area determined from triplicates.

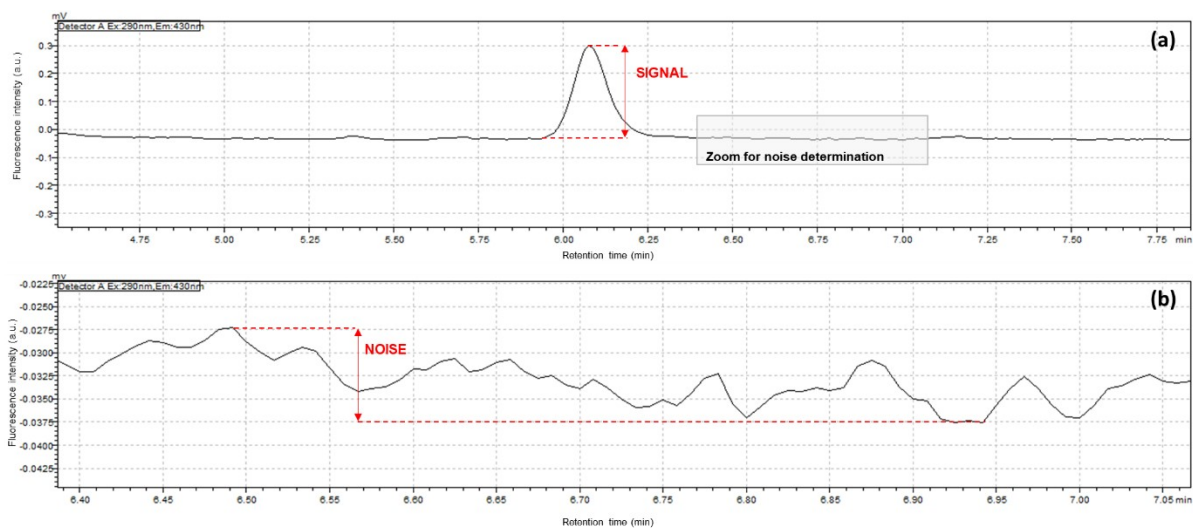

**Figure S3.** Example of signal and noise determinations for Limit of Detection (LOD) and Limit of Quantification (LOQ) calculations for the quantification of BaP by UHPLC/FLD: **(a)** signal determined from the chromatogram corresponding to a standard solution of BaP at a concentration of  $0.05 \mu\text{g L}^{-1}$  in acetonitrile; **(b)** noise experimentally determined from the baseline obtained in the same chromatogram, here, just after the peak of BaP.

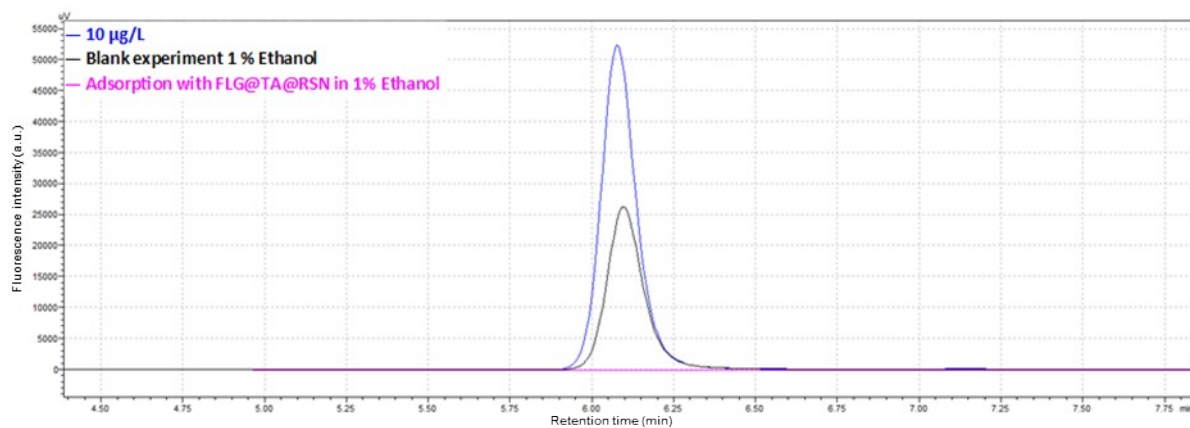

**Figure S4.** Examples of chromatograms obtained for a standard solution of BaP at a concentration of  $10 \mu\text{g L}^{-1}$  in acetonitrile (blue); at the end of the blank experiment with an initial concentration of BaP of  $10 \mu\text{g L}^{-1}$  in 1% ethanol : 99% water (black); at the end of the adsorption experiment with an initial concentration of BaP of  $10 \mu\text{g L}^{-1}$  in 1% ethanol : 99% water (pink).

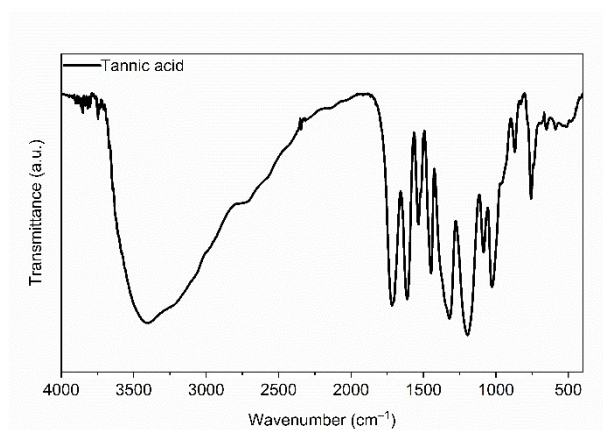

**Figure S5.** IR spectrum of tannic acid.



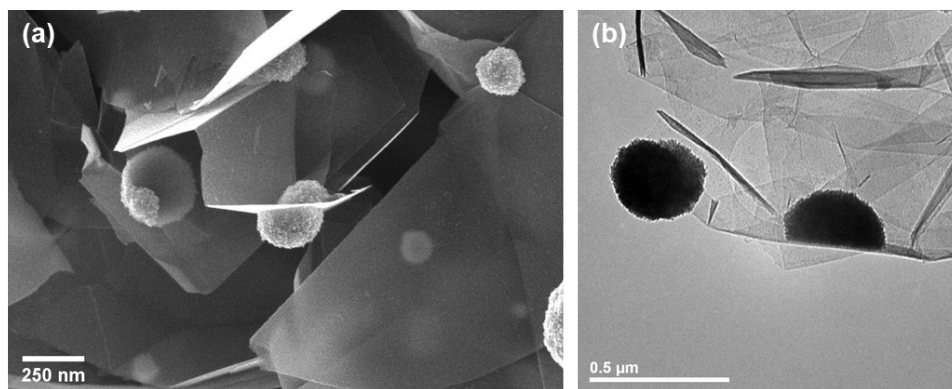

**Figure S6.** (a) Scanning Electron Microscopy (SEM) image and (b) Transmission Electron Microscope (TEM) image of FLG@TA@RSNs CNs.

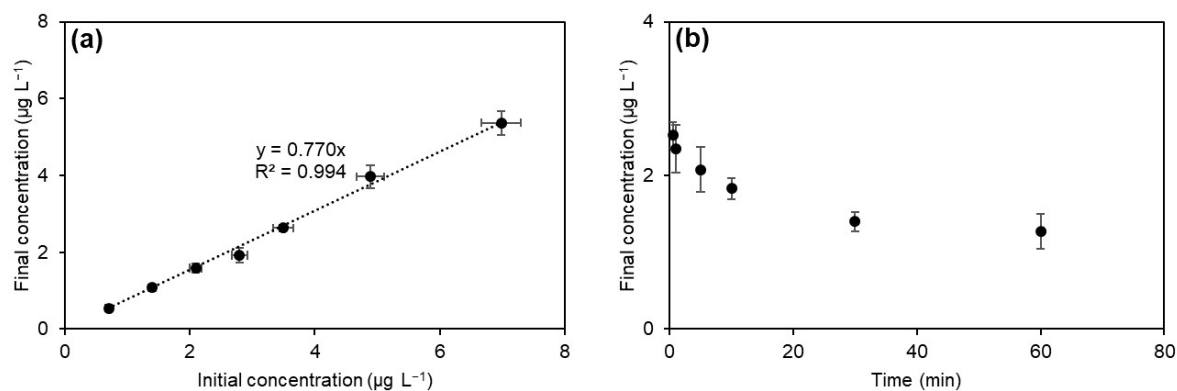

**Figure S7.** Blanks experiments in 1% Ethanol to quantify adsorption by glassware at room temperature: **(a)** isotherm experiments; **(b)** kinetics experiments. The vertical error bars correspond to the standard deviation of final concentration of BaP in solution determined from triplicates, while the horizontal ones in Figure S7(a) are based on the standard deviation of concentration of BaP in the fresh working solution prepared immediately before the experiments.

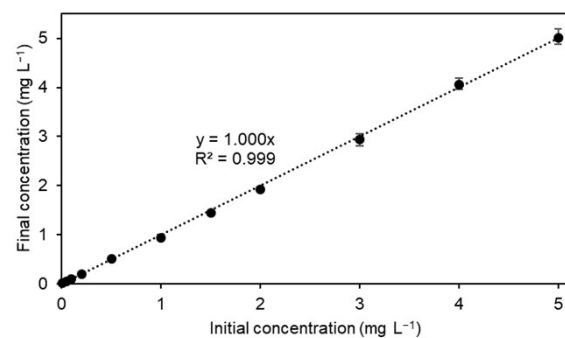

**Figure S8.** Blank experiments in 50% Ethanol to quantify BaP adsorption by glassware at room temperature. The vertical error bars correspond to the standard deviation of final concentration of BaP in solution determined from triplicates.
